# 1 **Bacterial filamentation drives colony chirality**

2 Andrés Aranda-Díaz<sup>1</sup>, Cecilia Rodrigues<sup>2,3</sup>, Alexandra Grote<sup>1</sup>, Jiawei Sun<sup>1</sup>, Carl Schreck<sup>4</sup>,

3 Oskar Hallatschek<sup>4</sup>, Anton Souslov<sup>5</sup>, Wolfram Möbius<sup>2,3,†</sup>, Kerwyn Casey Huang<sup>1,6,7,†</sup>

4

5 <sup>1</sup>Department of Bioengineering, Stanford University, Stanford, CA, USA

6 <sup>2</sup>Living Systems Institute, University of Exeter, Exeter EX 4QD, United Kingdom

7 <sup>3</sup>Physics and Astronomy, College of Engineering, Mathematics and Physical Sciences,

8 University of Exeter, Exeter EX4 4QL, United Kingdom

9 <sup>4</sup>Department of Physics, University of California at Berkeley, Berkeley, CA, USA

10 <sup>5</sup>Department of Physics, University of Bath, Bath BA2 7AY, United Kingdom

11 <sup>6</sup>Department of Microbiology and Immunology, Stanford University School of Medicine,

12 Stanford, CA 94305, USA

13 <sup>7</sup>Chan Zuckerberg Biohub, San Francisco, CA 94158

14

15 †Corresponding authors: [kchuang@stanford.edu](mailto:kchuang@stanford.edu) and [w.moebius@exeter.ac.uk](mailto:w.moebius@exeter.ac.uk)

16 *Running title: Filamentation drives colony chirality*

17

18 *Keywords: A22, MreB, cephalixin, cell division, anaerobic growth, temperature,*

19 *peptidoglycan, cell wall*

20 **Abstract**

21 Chirality is ubiquitous in nature, with consequences at the cellular and tissue scales. As  
22 *Escherichia coli* colonies expand radially, an orthogonal component of growth creates a  
23 pinwheel-like pattern that can be revealed by fluorescent markers. To elucidate the  
24 mechanistic basis of this colony chirality, we investigated its link to left-handed, single-cell  
25 twisting during *E. coli* elongation. While chemical and genetic manipulation of cell width  
26 altered single-cell twisting handedness, colonies ceased to be chiral rather than switching  
27 handedness, and anaerobic growth altered colony chirality without affecting single-cell  
28 twisting. Chiral angle increased with increasing temperature even when growth rate  
29 decreased. Unifying these findings, we discovered that colony chirality was associated with  
30 the propensity for cell filamentation. Inhibition of cell division accentuated chirality under  
31 aerobic growth and generated chirality under anaerobic growth. Thus, regulation of cell  
32 division is intrinsically coupled to colony chirality, providing a mechanism for tuning  
33 macroscale spatial patterning.

## 34 **Introduction**

35 An object is chiral if it is distinguishable from its mirror image. Chirality is prevalent  
36 throughout nature at all scales, and stereoisomers are often functionally distinct, from our  
37 left and right hands to L- and D-amino acids that are used for metabolism/translation and  
38 bacterial cell-wall synthesis, respectively. Chirality is manifest in polymers that form  
39 helices, such as bacterial flagella and cytoskeletal filaments (1, 2). Chirality can also be an  
40 intrinsic property of individual cells; for instance, myosin in *Drosophila* can reverse  
41 handedness in cells, which feeds forward to affect organ handedness (3). Chirality drives  
42 the development of left-right asymmetry generation in organs of *Drosophila melanogaster*  
43 (4) and in the *Caenorhabditis elegans* embryo (5). Plants twist as they grow, and mutants in  
44 SPIRAL2 change that twist from left- to right-handed; this handedness reversal is coupled  
45 to a switch from anisotropic growth to isotropic growth (6). However, it is largely unknown  
46 how chirality at the tissue and organismal scales is linked to cellular and molecular  
47 properties. Here, we investigate the link between chirality and growth at the micron scale  
48 of individual bacterial cells and chirality at the millimeter scale of colonies, visible to the  
49 naked eye.

50

51 Many rod-shaped bacterial cells exhibit twisting at the single-cell level during growth. In  
52 the Gram-negative bacterium *Escherichia coli*, growth occurs along the body of the cell and  
53 not at the poles (7). As the two ends move apart from one another, they also rotate in  
54 opposite directions, representing left-handed twist (Fig. 1A) (8). Twisting has also been  
55 observed in the Gram-positive *Bacillus subtilis* (9), in a right-handed manner (8). Bacterial  
56 growth requires expansion of the cell wall, a rigid macromolecule composed of crosslinked

57 glycan strands (10) that is necessary and sufficient for cell-shape determination (11). A  
58 biophysical model of cell-wall growth quantitatively predicted the degree of cell twisting  
59 generated by a helical pattern of insertion, which produced cell-wall material with the  
60 opposite handedness (8, 12). The bacterial actin homolog MreB (13), which is responsible  
61 for the spatiotemporal patterning of cell wall material (7), was required for cell twisting  
62 (8). The small molecule A22 depolymerizes MreB; at high concentrations, cells eventually  
63 round up and lyse (14). Twisting of *E. coli* cells is tunable: as cells widen under increasing  
64 sublethal levels of A22 treatment (15), the angle of MreB motion, which is thought to  
65 signify the placement of new strands of cell wall material (16), rotates and ultimately  
66 adopts an angle on the opposite side of the line perpendicular to the long axis of the cell,  
67 signifying a gradual conversion of twisting from left- to right-handed (15).

68

69 Bacterial colonies can also exhibit chirality during growth (17-19). This effect is striking in  
70 experiments investigating range expansions, in which otherwise genotypically and  
71 phenotypically identical cells producing fluorescent proteins of two different colors (purely  
72 for the purposes of distinguishing genotypes) are inoculated onto an agar plate to grow  
73 into a colony. As the colony expands, cells on the exterior have preferential access to  
74 uncolonized surface area and nutrients, leading to spatial segregation of the two  
75 fluorophores in well-defined “sectors” that expand outward, ultimately producing a  
76 pinwheel pattern. Boundaries between these sectors provide a frozen record of colony  
77 growth that displays a chiral angle (19). On top of the wiggling motion of boundaries  
78 between sectors, the boundaries of many species such as *E. coli* exhibit deterministic  
79 chirality in the form of expansion biased along the edge of the colony (17). Ultimately, cells

80 themselves are likely to generate the observed behavior at the colony scale, although  
81 colony chirality must also be dependent on environmental conditions such as adhesion and  
82 surface wetness, both of which dictate cell motility. Indeed, *E. coli* colony chirality was  
83 shown to be mediated by close interactions between cells and the surface, with expression  
84 of pili and other adhesive structures suppressing chirality, and agar stiffness affecting  
85 chirality (20). There are also strain-specific differences in colony chirality (20), even  
86 though twisting at the single-cell level is relatively constant (8). Previous studies that  
87 attempted to explore the relationship between cell shape or cell-wall synthesis and colony  
88 chirality made comparisons between different species (20). However, a systematic  
89 interrogation of the links between single-cell properties and colony chirality through  
90 environmental, genetic, and physiological perturbations has not been undertaken. In  
91 particular, it is critical to employ a strategy that tunes behaviors such as twisting in a single  
92 organism in order to probe potential couplings with colony chirality.

93

94 Here, we set out to determine the relationship between cell shape, twisting and  
95 handedness at the single-cell level, and macroscopic colony chirality. Using single-cell and  
96 colony imaging, we found that A22 treatment and anaerobic growth inhibited growth and  
97 reduced colony chirality to near zero, making it unclear whether single-cell twisting was  
98 responsible for the change in chiral angle. Cells at the edge of the colony adapted to A22  
99 treatment by reducing their width and length. Chiral angle increased with increasing  
100 temperature, even at high temperatures that caused a decrease in growth, indicating that  
101 growth rate does not determine colony chirality. Across all conditions, the presence of  
102 chiral colonies was associated with filamentous cells at the edge of the colony, and

103 antibiotic inhibition of division resulted in enhanced chirality. These results reveal a  
104 complex connection between single-cell dimensions and population level spatial patterns,  
105 underscoring the role of cell division in determining colony chirality.

106 **Results**

107

108 ***E. coli* DH5 $\alpha$  cells exhibit similar single-cell twisting as MG1655**

109 Chirality in *E. coli* colonies is readily observed when using strain DH5 $\alpha$  (17, 19), with a  
110 clockwise rotation when viewed from the top. A recent comparison between *E. coli* strains  
111 revealed that on low-salt LB agar, *E. coli* MG1655 colonies also rotate clockwise, but exhibit  
112 less pronounced chirality than DH5 $\alpha$  colonies (20). To determine whether this difference in  
113 chirality could be due to differences in twisting at the single-cell level (Fig. 1A), we utilized  
114 our previously developed Twist-n-TIRF method (15). In this method, cells are treated with  
115 the beta-lactam antibiotic cephalexin to block cell division, allowing for easier visualization  
116 of twisting. The cell wall is labeled uniformly with a stationary dye (in this case, Wheat Germ  
117 Agglutinin (WGA) labeled with Alexa Fluor 488 (7)), and then the bottom of the cell is  
118 bleached by a TIRF laser. As the cell subsequently grows, twisting causes bright, unbleached  
119 regions to rotate into the TIRF imaging plane (Fig. 1B), and the handedness and degree of  
120 twisting can be computed from the direction and rate of fluorescence appearance,  
121 respectively (15). Virtually all DH5 $\alpha$  cells clearly twisted in a left-handed manner on LB  
122 agarose pads (Fig. 1C), similar to MG1655 on EZ-RDM pads (15) and consistent with our  
123 previous study employing beads bound to the outer membrane (8). Thus, left-handed  
124 twisting is conserved across *E. coli* strains and growth media.

125

126 Given the central role of MreB in single-cell twisting (8, 15), we next sought to quantify the  
127 effects of A22 treatment on DH5 $\alpha$ . We treated log-phase DH5 $\alpha$  cells expressing YFP or CFP  
128 from a plasmid for 3 h with a range of A22 concentrations from below to above the minimum

129 inhibitory concentration ( $\sim 1 \mu\text{g}/\text{mL}$ ) in LB (Methods). At higher A22 concentrations, Twist-  
130 n-TIRF measurements revealed an increasing fraction of DH5 $\alpha$  cells that exhibited right-  
131 handed or ambiguous twisting (Fig. 1C), similar to the handedness reversal of MG1655 (15).  
132 Cell shape also changed as expected from previous experiments with MG1655 (15): DH5 $\alpha$   
133 cells increased in width and decreased in length as A22 concentration was increased (Fig.  
134 1D). Thus, DH5 $\alpha$  exhibits similar changes in twisting and cell shape across A22  
135 concentrations as MG1655.

136

### 137 **A22 treatment reduces colony chirality**

138 The inversion of twisting handedness due to A22 treatment provides a qualitative change in  
139 cellular behavior through which to interrogate the connection between single-cell and  
140 colony-level behaviors. If single-cell twisting is the determinant of colony chirality, we  
141 should see a change from clockwise to counter-clockwise rotation within colonies as single-  
142 cell twisting changes with increasing A22 concentration. To test this hypothesis, we grew  
143 mixed colonies of YFP- and CFP-expressing DH5 $\alpha$  on LB plates at 37 °C with a range of A22  
144 concentrations and imaged the colonies after 7 days of growth. As expected, the frozen  
145 record revealed that colonies quickly developed into sectors of single colors (Fig. 2A). We  
146 segmented the images, identified sector boundaries, plotted the change in angle against a  
147 function of colony radius, and computed the chiral angle (Fig. 2A, Methods). In the absence  
148 of A22, the chiral angle was  $\theta=6.4^\circ$  (Fig. 2B,C), similar to previous measurements (17, 20).  
149 A22 treatment reduced the chiral angle to approximately zero (Fig. 2B,C), but even at high  
150 concentrations there was not clear evidence for reversal of handedness, in seeming  
151 contradiction to our hypothesis.



152

153 In a recent study, we showed that *E. coli* adapts to the cell widening effects of A22 treatment  
154 by increasing expression of *mreB*, resulting in a subsequent decrease in cell width (21). If  
155 adaptation that altered cellular dimensions occurred during colony growth, such changes  
156 could have confounded our above test of the effect of A22 and single-cell twisting on colony  
157 chirality. To test whether cells on LB plates with A22 changed morphology over time, we  
158 sampled cells from the edge of colonies once per day and imaged the cells to quantify their  
159 dimensions (Methods). As we suspected, cell width decreased steadily over the course of a  
160 week, reaching a relatively constant width displayed by cells on plates without A22 (Fig. 2D);  
161 coincident with the width decrease, length gradually increased (Fig. 2D). For the widest cells  
162 (~1.4  $\mu\text{m}$ ), the cell width measured on day 1 on LB+1.5  $\mu\text{g}/\text{mL}$  A22 was equivalent to the cell  
163 width in liquid LB+0.5  $\mu\text{g}/\text{mL}$  A22 (Fig. 1D). Under this condition, ~60% of cells exhibited  
164 no or ambiguous twisting (Fig. 1C), consistent with the lack of chirality at the colony level.  
165 Thus, adaptation of cell shape on plates prevents a direct test of whether A22-mediated  
166 reversal of single-cell twisting handedness necessarily reverses colony-chirality  
167 handedness.

168

169 **Heterologous expression of a foreign cell-wall synthesis enzyme reverses single-cell**  
170 **twisting but colonies do not exhibit chirality**

171 To circumvent adaptation associated with A22 treatment, we sought an alternate  
172 mechanism for altering cell width and single-cell twisting. We previously showed that  
173 heterologous expression of *mrda*, which encodes the essential transpeptidase PBP2 (22),  
174 from *Vibrio cholerae* caused *E. coli* MG1655 cells lacking the endogenous *mrda* gene to widen

175 and to reverse twisting handedness similar to A22 treatment (15). We constructed DH5 $\alpha$   
176  $\Delta$ *mrda* strains with constitutive expression of *V. cholerae mrda* (*Vc-mrda*) and a plasmid  
177 coding for CFP or YFP from a parental strain DH5 $\alpha$ -E, resulting in DH5 $\alpha$ -E  $\Delta$ *mrda* *Vc-mrda*  
178 CFP and DH5 $\alpha$ -E  $\Delta$ *mrda* *Vc-mrda* YFP (Methods). The mean cell width of these strains was  
179 significantly larger than DH5 $\alpha$ -E or the DH5 $\alpha$ -H strain used in the experiments above (Fig.  
180 3A,B). DH5 $\alpha$ -E  $\Delta$ *mrda* *Vc-mrda* cells were highly sensitive to cephalixin, resulting in rapid  
181 lysis during Twist-n-TIRF experiments that precluded measurement of single-cell twisting.  
182 Unlike A22-treated wild-type cells, untreated fluorescent DH5 $\alpha$ -E  $\Delta$ *mrda* *Vc-mrda* cells  
183 remained wider and shorter than wild-type cells over 5 days of growth in colonies (Fig. S2).  
184 Colonies displayed highly reduced chiral angle (Fig. 3C,D), leaving it unclear whether  
185 reversal of handedness at the single-cell level results in reversed handedness of colony  
186 chirality.

187

### 188 **Quenching of colony chirality between two surfaces is likely due to lack of twisting in** 189 **anaerobic environments**

190 We hypothesized that colonies sandwiched between two agar surfaces should not exhibit  
191 any chirality based on symmetry considerations, independent of changes in cell shape. To  
192 test this hypothesis, we inoculated a droplet of CFP-expressing and YFP-expressing DH5 $\alpha$   
193 cells as before, allowed the droplet to dry, and then placed another large agar pad on top of  
194 the agar plate (Fig. 4A). The colony continued to expand between these two surfaces,  
195 presumably due to the lack of agar crosslinking between the two pads as compared to within  
196 the pads. Cells emitted very little fluorescence, which we surmised was due to their lack of  
197 oxygen; anaerobic conditions prevent maturation of fluorescent proteins (23). GFP matures

198 more readily at low temperatures (24), hence we incubated sandwiched colonies at 4 °C  
199 (Methods) and then quantified the fluorescence patterns. The sector boundaries were  
200 essentially achiral (Fig. 4A,B, S3).

201

202 To test whether the absence of chirality was due to the restoration of symmetry at the  
203 interface or to the depletion of oxygen, we grew a mixed colony on a single agar surface in  
204 anaerobic conditions. We observed little to no chirality (Fig. 4C,D), indicating that anaerobic  
205 growth is sufficient to abolish colony chirality. Colonies were smaller after 7 days of  
206 anaerobic growth compared with aerobic growth. To test whether anaerobic growth  
207 abolished single-cell twisting, we performed Twist-n-TIRF in anaerobic conditions  
208 (Methods). Cells continued to twist in a left-handed fashion (Fig. 4E), thus lack of colony  
209 chirality in anaerobic conditions is not due to lack of single-cell twisting. Instead, these  
210 findings suggest that another, oxygen-dependent factor influenced the level of colony  
211 chirality.

212

### 213 **Temperature alters growth rate and chirality without changing cell twisting**

214 After 7 days, colonies grown on LB+A22 (Fig. 2A) or anaerobically (Fig. 4C) were significantly  
215 smaller than when grown aerobically on LB alone (Fig. 2A, 4C). Thus, we sought to test  
216 whether growth rate was a major determinant of colony chirality. Temperature is well  
217 known to modulate growth rate (25). In liquid, the maximum growth rate of DH5 $\alpha$  increased  
218 as a function of temperature up to an optimal temperature of ~42 °C (Fig. 5A, S4). We grew  
219 mixed colonies across a range of temperatures and imaged them after 7 days (Fig. 5B).  
220 Colony size was also temperature-dependent, with smaller colonies at 30 and 42 °C than at

221 37 °C (Fig. 5A). However, chiral angle increased monotonically with temperature up to 42 °C  
222 (Fig. 5C), indicating that chirality is regulated by a factor other than growth rate that changes  
223 with temperature.

224

### 225 **Filamentation is linked to the extent of colony chirality**

226 Single-cell twisting was approximately constant across temperatures (Fig. S5), again  
227 highlighting that another factor must be dictating chirality. Motivated by our observations  
228 that A22 treatment reduced cell length (Fig. 1D) and chiral angle (Fig. 2C), we measured log-  
229 phase DH5 $\alpha$  cellular dimensions in liquid culture at various temperatures. Length and width  
230 both increased monotonically with temperature (26), with cells at 44 °C more than twice as  
231 long as those at 21 °C (Fig. S6). To verify whether cells were similarly elongated in colonies  
232 *in situ*, we imaged colonies directly and identified filamentous cells at the extreme edge of  
233 colonies with pronounced chirality (37 °C and 42 °C) (Fig. 6A), while less filamentation was  
234 apparent in colonies with little chirality (lower temperatures and anaerobic growth) (Fig. 6  
235 S7). Because of the difficulty in segmenting individual cells from *in situ* images of the colony,  
236 we sampled and imaged cells from the colony edge. We surmised that higher cell density in  
237 images was indicative of more sampling towards the center of the colony. Thus, to correct  
238 for variability in sampling location we focused our analysis on sets of images with similar  
239 cell density (Fig. S8). As in liquid, mean cell length increased with temperature and colonies  
240 grown at higher temperatures displayed more filamentous cells (Fig. 6B). Interestingly, cells  
241 grown in liquid had similar cellular dimensions aerobically and anaerobically, but cells  
242 sampled from the edge of colonies grown anaerobically were significantly shorter and wider

243 than those from the edge of aerobic colonies (Fig. 6C, S9). These observations are consistent  
244 with the hypothesis that some degree of cell filamentation is necessary for colony chirality.

245

### 246 **Inhibition of cell division enhances chirality**

247 To determine whether filamentation and chirality are causally linked, we sought to increase  
248 the fraction of filamentous cells within a colony. We grew mixed cultures at 37 °C on various  
249 concentrations of cephalexin, a beta-lactam antibiotic that inhibits the division-specific  
250 transpeptidase PBP3 (27). At higher concentrations, colonies exhibited pronounced chirality  
251 similar to 42 °C, and chiral angle increased in a dose-dependent manner (Fig. 7A, S10). To  
252 test whether cephalexin would introduce chirality in situations where the chiral angle was  
253 close to zero, we grew mixed cultures anaerobically on LB+10 µg/mL cephalexin plates.  
254 Remarkably, cephalexin-treated colonies exhibited obvious chirality (Fig. 7C). Thus,  
255 inducing filamentation is sufficient to introduce or accentuate colony chirality.

## 256 **Discussion**

257 In this study, we systematically measured the degree and handedness of twisting at the  
258 single-cell level across many perturbations, and determined that while changes that perturb  
259 single-cell twisting alter colony chirality, changes that perturb colony chirality do not  
260 necessarily alter single-cell twisting. It is clear that many factors interact to determine colony  
261 structure, including forces between cells and accessibility of nutrients (28), cellular  
262 geometry (29), and interactions of cells with each other and with the surface (20). Previous  
263 findings connecting surface attachment with colony chirality (20) are not inconsistent with  
264 our study, since the dependence of agar properties and surface attachment on temperature,  
265 cell size, and oxygen are unknown. Our colony chirality observations are phenomena that  
266 are either intrinsically three-dimensional or originate from cells being subject to a solid  
267 surface on one side and an air surface on the other, as confining the cells between two agar  
268 pads may eliminate chirality by removing the air-agar asymmetry (Fig. 4A). Regardless, our  
269 data highlight the role of cell filamentation in establishing colony chirality, with division-  
270 inhibiting cephalaxin treatment leading to the introduction of chirality in colonies grown  
271 anaerobically (Fig. 7). Moreover, cell length is the variable that unifies colony chirality across  
272 all of our growth conditions. These results reveal a complex connection between single-cell  
273 dimensions and population level spatial patterns (30, 31).

274

275 Our original motivation for this study was to establish whether colony chirality can be traced  
276 back to single-cell behaviors. While we have shown that cell filamentation is coupled to the  
277 generation of colony chirality, it remains unclear whether single-cell twisting is also a factor.  
278 A22 treatment does reduce chirality (Fig. 2) as does genetic manipulation of the cell-wall

279 synthesis machinery (Fig. 3). Moreover, single-cell twisting and colony chirality each have a  
280 defined handedness in the absence of A22. However, it remains unclear whether and how  
281 handedness at the microscopic scale determines handedness at the macroscopic scales.

282

283 The connection between filamentation, and more generally cell shape, and colony  
284 patterning was unexpected, in part because the regulation of division across environmental  
285 conditions such as A22 treatment, anaerobic growth, and temperature are poorly  
286 understood. In the case of A22, it was critical to measure cell shape at the edge of the  
287 colony, which revealed that the cell width phenotype characteristic of A22 treatment on  
288 short time scales was reversed after several days (Fig. 2D), likely due to transcriptional  
289 adaptation (21). It is intriguing that regulation of cell division takes place on such long time  
290 scales. The tunability of chirality using cephalixin provides an interesting control knob for  
291 the design of macroscale patterns in bacterial communities.

292

293 What are the origins of colony chirality? Ultimately, chirality must materialize from some  
294 molecular symmetry breaking, and while the cell wall is an enticing candidate, the  
295 extracellular environment cannot be ruled out. This knowledge gap motivates the  
296 quantification of single-cell twisting and colony chirality across more strains and species, to  
297 determine whether the two are generally coupled. An ideal demonstration would be the  
298 reversal of handedness of a single species, as we attempted in this work, although it may be  
299 impossible to construct a right-handed *E. coli* cell that is stable during filamentation without  
300 reprogramming many cell-wall synthesis components.

301

302 A wealth of exotic patterns and mechanical properties can emerge from chiral constituents  
303 exerting forces on each other and their environments (32-34), including periodic crystals of  
304 rotating particles (35-37) that can synchronize into exotic phases (38). Mixtures of  
305 oppositely rotating particles tend to phase separate (39, 40), leading to complex structures  
306 and flows at chiral-phase interfaces (41, 42). Analyzing flow patterns and excitations of  
307 chiral active fluids has led to the design of topological states of matter (43, 44) and  
308 predictions of novel hydrodynamic responses (45, 46) that have been experimentally  
309 measured (47). Biological settings such as colony chirality may provide even more complex  
310 ways to connect microscopic forces of chiral active components to macroscopic handedness.  
311 For example, the observation that filamentation in only a few percent of cells is sufficient to  
312 induce chirality in anaerobically grown colonies motivates the study of mixtures of active  
313 particle with a heterogeneous distribution of geometries.

314

315 From an ecological and evolutionary perspective, what is the relevance of colony chirality?  
316 Recent work has suggested that chirality is an important population-level trait that  
317 mediates competition, invasion, and ultimately spatial structure within a bacterial  
318 community (48). If so, then our work suggests that colony-scale patterning has likely  
319 applied selective pressures on division at the cellular-scale. To design the spatial structure  
320 of bacterial communities, it is advantageous to control the emergent pattern of cell growth  
321 rather than have to establish patterns from the start. To achieve this control will ultimately  
322 require a mechanistic model for colony chirality, the development of which will be  
323 facilitated by the discovery that cellular properties such as cell length are critical  
324 parameters.



## 325 **Materials and Methods**

326

### 327 ***Bacterial strains and plasmids***

328 Strains used in this study are described in Table S1. In brief, we used three pairs of strains.

329 In each pair, the two strains have a common genetic background and carry plasmids

330 expressing CFP or venus YFP. The pair used for the majority of experiments is identical to

331 the one used in previous studies reporting colony chirality (17, 19, 20). In each pair, there

332 were no obvious fitness differences between the two strains (both strains were able to

333 form sectors). Fluorescence levels were sufficient for imaging even for basal expression in

334 the absence of IPTG, hence we did not include IPTG in any of the media.

335

336 For this study, we constructed *E. coli* DH5 $\alpha$   $\Delta$ *mrda* strains with constitutive expression of *V.*

337 *cholerae* *mrda* by replacing the genomic *E. coli* *mrda* sequence with a 4169-bp PCR

338 fragment encoding the *V. cholerae* *mrda* (*Vc-mrda*) sequence and kanamycin resistance

339 cassette, followed by selection for stability. Construction of the DH5 $\alpha$   $\Delta$ *mrda* strain was as

340 follows: the *Vc-mrda* DNA fragment was amplified from the pww308-*Vcmrda* construct

341 (15) with primers that have 20 nucleotides of homology to the plasmid DNA sequence and

342 50 nucleotides of homology to the genomic *Ec-mrda* target sequence, specifically

343 delmrdaFor (5'-

344 ACGCAGCGGATGAAACTACAGAACTCTTTTCGCGACTATACGGCAGAGCCACGTTGTGTCTCAAA

345 ATC-3') and delmrdaRev (5'-

346 TATCCGTCATGATTAATGGTCTCCGCTGCGGCAACCGCTGGATTTCCGCATCCTAGGTCATGG

347 CTGTATTAC). The DH5 $\alpha$  strain lacks the ability for homologous recombination. Therefore,

348 *E.coli* strain DH5 $\alpha$  (Invitrogen) was first transformed with the pSIM5 plasmid (pSC101  
349 repA<sup>ts</sup>) encoding Red recombination proteins. Selection of transformed cells was  
350 performed by growing in Lennox LB in the presence of 17.5  $\mu$ g/mL chloramphenicol at 30  
351  $^{\circ}$ C to allow pSIM5 replication, producing strain eCR106 that was able to perform  
352 homologous recombination. eCR106 cells were transformed with the gel-purified *Vc-mrdA*  
353 DNA fragment via electroporation as follows: eCR106 cells were grown at 30  $^{\circ}$ C to OD=0.4-  
354 0.5, transferred to 42  $^{\circ}$ C for 15 min for induction of Red proteins, and then transferred to  
355 ice for 10 min. Cells were centrifuged at 3000*g* and the pellet was washed with ice-cold  
356 water twice before resuspending in 10% glycerol solution for electroporation using a  
357 GenePulser XCell (BioRad) electroporator with the pre-set bacterial protocol for *E. coli*  
358 using a 1-mm cuvette. After transformation, cells were incubated at 30  $^{\circ}$ C for 2 h before  
359 selection on Lennox LB agar plates with 25  $\mu$ g/mL kanamycin. Transformed cells were  
360 identified by colony PCR with primers delBFor (5'-ACATCATCGCCTTAGACGTTC-3') and  
361 delBRev (5'-AGATGGACTTTATCCCAGAATG-3') for the upstream/downstream *E. coli mrdA*  
362 sequence and primers delCFor (5'-AGCGGATGAAACTACAGAACTC-3') and delCRev (5'-  
363 CGGCAACCGCTGGATTTTC).

364  
365 Colonies were picked and grown in Lennox LB at 37  $^{\circ}$ C to remove the pSIM5 plasmid,  
366 creating strain eCR111. pSIM5 loss was confirmed by the absence of growth under  
367 chloramphenicol selection. Genomic eCR111 DNA was extracted using a GeneJET Genomic  
368 DNA Purification Kit (ThermoFisher) and used as DNA template for amplification with  
369 primers delBFor and delCRev. The PCR fragment was sequenced using a MinION (Oxford

370 Nanopore Technologies). Sequencing results showed that the Tet promoter region of the  
371 *Vc-mrdA* fragment used for the recombination was lost in this strain.

372

373 CFP/YFP plasmids were constructed by cloning the fluorescent protein coding sequence into  
374 pSTV28 (Takara Bio Europe SAS) with EcoRI/SalI restriction sites. eCR111 cells were  
375 transformed with CFP/YFP constructs via electroporation as above, generating strains  
376 eCR112\_1 with CFP and eCR112\_2 with YFP. Selection of transformants was achieved using  
377 35 µg/mL chloramphenicol.

378

### 379 ***Growth of mixed colonies***

380 A step-by-step protocol is available online on protocols.io  
381 (<https://www.protocols.io/view/growth-of-mixed-e-coli-colonies-bqgjmtun>). In short,  
382 agar plates (6 cm in diameter) were prepared with 10 mL of Lennox LB (RPI, Cat. #L24066;  
383 Melford, Cat. #L24060-100.0 for colonies sandwiched between agar slabs and  
384 corresponding control experiments) with 1.5% agar (BD, Cat. #214530) and left on the  
385 bench overnight. Plates were used the next day or stored at 4 °C. As necessary, A22 or  
386 cephalixin were added from frozen stocks to the liquid after autoclaving. To initiate colony  
387 growth, the appropriate pair of fluorescent *E. coli* strains were grown overnight at 37 °C in  
388 liquid Lennox LB. Both cultures were diluted 10-fold in fresh LB and mixed. One microliter  
389 droplets were pipetted onto prewarmed plates and grown at 37 °C, typically for 7 to 8 days.  
390 Anaerobic growth experiments were carried out in a custom anaerobic chamber (Coy Lab  
391 Products). Colony growth between agar surfaces was achieved by cutting an agar pad out of  
392 a fresh plate and placing it upside down onto freshly inoculated cultures.

393

394 ***Sampling from mixed colonies***

395 Cells were sampled from the border of colonies using a 20- $\mu$ L LTS micropipette tip  
396 (Rainin). After touching the edge of the colony, cells were resuspended in 20  $\mu$ L PBS and 1  
397  $\mu$ L was spotted onto PBS 1% agarose pads for imaging.

398

399 ***Imaging of mixed colonies***

400 Fluorescence images of colonies were acquired after 7-8 days of growth using a 1X  
401 objective on a Nikon Eclipse Ti-E inverted fluorescence microscope equipped with a DU897  
402 electron multiplying charged couple device (EMCCD) camera (Andor) using  $\mu$ Manager v.  
403 1.4 (49), or a Nikon TE-2000 or Zeiss Axio Zoom.V16 microscope. Colonies sandwiched  
404 between two agar surfaces and the colonies in the corresponding control experiments were  
405 imaged after 7 days at 4 °C. Colonies that did not show sufficient fluorescence at this point,  
406 were imaged again after 26 more days at 4 °C.

407

408 Edges of colonies were imaged with a 20X objective on a Nikon Eclipse Ti-E inverted  
409 fluorescence microscope equipped with a DU897 camera (Andor) using  $\mu$ Manager v. 1.4.

410

411 ***Identifying colony radius and sector boundaries in mixed colonies***

412 Images were imported into Matlab. The difference between YFP and CFP images was used  
413 to identify boundaries of intensity using the 'edge' function with the 'Log' method. The  
414 center of the colony was defined by fitting a circle to 20 points manually selected from the  
415 images either from the border of the colony if the colonies were small enough to fit in the

416 image, or from the border of the mixed-fluorescence sector at the center of the colony. The  
417 coordinates of the boundaries were transformed to polar coordinates based on the center  
418 of the colony. Points were mapped to traces by connecting nearest neighbors. Points too  
419 close to the center of the colony were discarded. Boundary traces were cleaned up  
420 manually: some were separated at a manually selected location when the traces clearly  
421 represented two sides of a sector, and some were removed because they clearly captured a  
422 feature that was not a sector boundary. Traces in polar coordinates were then smoothed.  
423 Some parameters (closeness to the center or the threshold for edge detected) were  
424 modified depending on the quality of the image. All traces from all colonies of a given  
425 experiment were then pooled. The mean was obtained by bootstrapping: random traces  
426 (selected with replacement) were averaged to calculate the slope, and then the slope was  
427 integrated to obtain a mean trace. This process was repeated 200 times to compute the  
428 final mean trace and the standard deviation over the 200 iterations.

429

430 All code is available in a GitHub repository [https://github.com/aarandad/ColonyChirality-](https://github.com/aarandad/ColonyChirality-KCH)  
431 KCH.

432

### 433 ***Growth measurements in liquid culture***

434 Optical density (OD) measurements were performed with an Epoch 2 plate reader (BioTek)  
435 at 37 °C with continuous shaking and OD<sub>600</sub> measured at 7.5-min intervals. Maximal growth  
436 rate was calculated as the maximal slope of ln(OD) with respect to time (calculated from a  
437 linear regression of a sliding window of 11 timepoints) using custom Matlab R2018b  
438 (Mathworks) code.

439

#### 440 ***Single-cell imaging***

441 Cultures were grown overnight at 37 °C in LB, and diluted 1:200 into fresh medium (with  
442 antibiotics when appropriate). For phase-contrast imaging, cells were spotted onto a 1%  
443 (w/v) agarose pad with LB. Cells treated with A22 were exposed to the drug for 2-3 h  
444 before imaging.

445

446 Phase-contrast and epifluorescence images were acquired with a Nikon Ti-E inverted  
447 microscope (Nikon Instruments) using a 100X (NA 1.40) oil immersion objective and a Neo  
448 5.5 sCMOS camera or a DU885 EMCCD (Andor Technology). The microscope was outfitted  
449 with an active-control environmental chamber for temperature regulation (HaisonTech,  
450 Taipei, Taiwan). Images were acquired using  $\mu$ Manager v. 1.4 (49). Cell contours were  
451 automatically segmented using *Morphometrics* (50) and a local coordinate system was  
452 defined based on the meshing algorithm from *MicrobeTracker* (51). Some images of cells  
453 sampled from the edge of colonies (Fig. 6) had clusters of cells that could not be segmented  
454 by *Morphometrics*. These images were processed with the neural network-based machine  
455 learning framework *DeepCell* (52) prior to segmentation with *Morphometrics*.

456

#### 457 ***Twist 'n' TIRF measurements***

458 Fluorescent WGA was added to liquid cultures to a final concentration of 25  $\mu$ g/mL. After  
459 2.5 h of growth, cells were pelleted at 8,000g for 1 min and washed with PBS once before  
460 being spotted onto a 1% (w/v) EZ-RDM 0.2% glucose or LB agarose pads with 10  $\mu$ g/mL  
461 cephalixin. For anaerobic Twist 'n' TIRF experiments, cultures were grown, washed, and

462 spotted onto agarose pads inside an anaerobic chamber. Mounted pads were fully sealed  
463 with VALAP before removal from the anaerobic chamber and imaging was conducted  
464 immediately.

465

#### 466 ***TIRF microscopy***

467 Twisting measurements were performed on a Ti-E inverted microscope (Nikon, NY, USA)  
468 with a 100X objective (NA 1.40). A Sapphire OPSL 488-nm laser (Coherent, CA, USA) was  
469 coupled into a TIRF illuminator (Nikon) attached to the microscope stand. Images were  
470 acquired with DU885 EMCCD (Andor, CT, USA) camera and synchronization between  
471 components was achieved using  $\mu$ Manager (49).

472

#### 473 ***Cell twisting analysis***

474 In Twist 'n' TIRF experiments, cell contours were computationally extracted from phase  
475 using Morphometrics (50). The integrated WGA fluorescence enclosed within the cell  
476 contour was quantified. These values were normalized to the pre-bleached level and  
477 plotted as a function of the change in length  $\Delta l$  relative to the pre-bleached length. Curves  
478 were then fitted to extract the slope  $\lambda$  representing the rate of fluorescence recovery due to  
479 twisting. The curves were fit over the first 3  $\mu\text{m}$  of elongation to avoid noise from  
480 photobleaching after large amounts of exposure.

481 **Acknowledgements**

482 We thank members of the Huang and Hallatschek lab for helpful discussions. This work  
483 was funded by NIH CAREER Award MCB-1149328 (to K.C.H.), the Allen Discovery Center at  
484 Stanford University on Systems Modeling of Infection (to K.C.H.). A.A.-D. is a Howard  
485 Hughes Medical Institute International Student Research fellow, a Stanford Bio-X Bowes  
486 fellow, and a Siebel Scholar. K.C.H. is a Chan Zuckerberg Investigator.



487 **Figures**

488

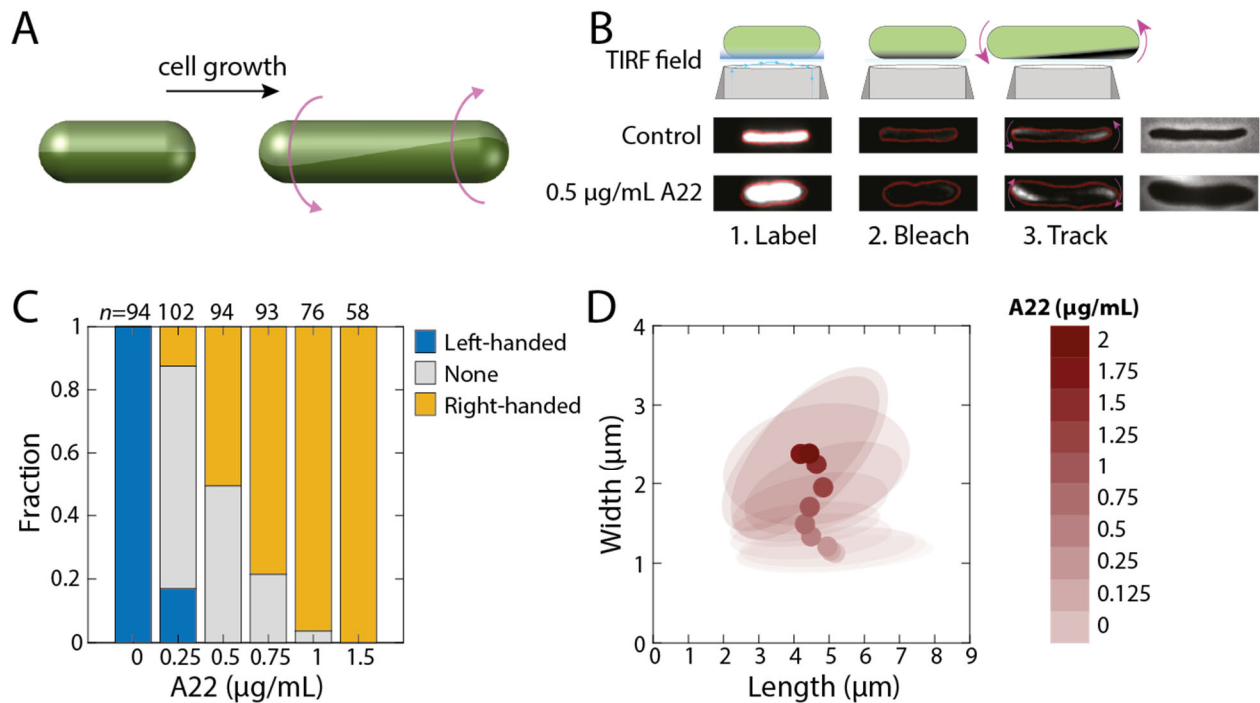

489

490 **Figure 1: A22 reverses twisting handedness and alters cellular dimensions in *E. coli***

491 **DH5 $\alpha$ .**

492 A) Schematic of left-handed twisting during elongation of a rod-shaped cell.

493 B) In the Twist-n-TIRF method, the cell surface is labeled and the side of the cell closest  
494 to the cover slip is bleached using a TIRF microscope. During subsequent TIRF  
495 imaging at lower intensity, unbleached parts of the cell appear associated with cell  
496 twisting (Methods). Rightmost panel: phase-contrast images. A22-treated *E. coli*  
497 DH5 $\alpha$  cells treated with A22 are typically shorter and wider than untreated cells and  
498 twist with opposite handedness during the tracking step; note the appearance of  
499 fluorescence on the lower left and upper right in the A22-treated cell, as opposed to  
500 the upper left and lower right in the untreated cell.

- 501 C) In the absence of A22, virtually all *E. coli* DH5 $\alpha$  cells exhibit left-handed twisting,  
502 while cells treated with 1.5  $\mu\text{g}/\text{mL}$  A22 exhibit right-handed twisting. The number  
503 of cells ( $n$ ) is indicated above each bar.
- 504 D) *E. coli* DH5 $\alpha$  cell width during log-phase growth in liquid increases as a function of  
505 A22 concentration. For concentrations  $<1 \mu\text{g}/\text{mL}$ , cell length decreases with  
506 increasing A22 concentration. Circles represent mean dimensions and ellipses  
507 represent the covariance matrix of length and width.  $n>50$  cells were quantified for  
508 each condition.

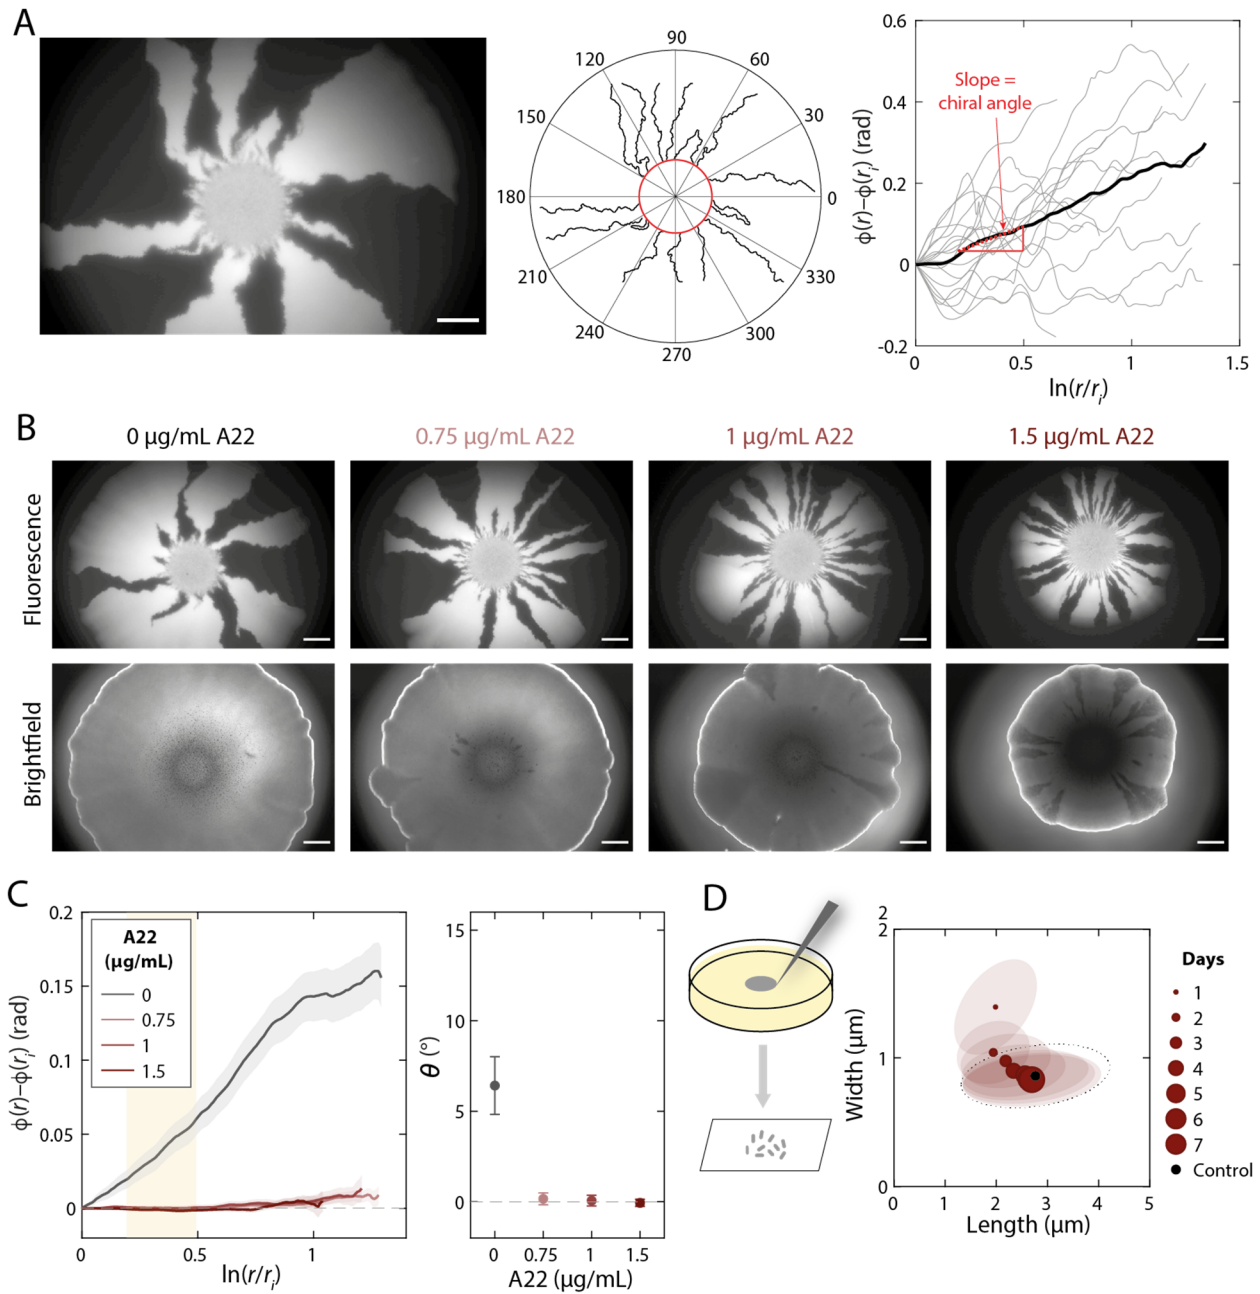

509

510 **Figure 2: A22 treatment reduces colony chiral angle.**

511 A) Genetic demixing during *E. coli* DH5 $\alpha$  colony growth results in mono-

512 clonal sectors (left). Although the shape of the boundaries between light (YFP) and dark sectors

513 (middle) appeared stochastic, quantitative image analysis revealed an overall

514 clockwise rotation of sector boundaries when viewed from the top (air interface).

515 Right: the slope (red) of the mean (thick black curve) is defined as the chiral angle.

516 Scale bar: 1 mm.

517 B) Images of typical colonies after 7 days of growth on plates with various  
518 concentrations of A22 illustrate that colony growth is hindered by A22. The bright  
519 outline in the brightfield images denotes the colony border. Sector boundaries were  
520 straighter at higher A22 concentrations. Scale bars: 1 mm.

521 C) Left: mean rotation of sector boundaries at various A22 concentration. Right: the  
522 chiral angle decreases at higher A22 concentrations. Each data point is the average of  
523  $n \geq 5$  colonies. Error bars represent 1 standard deviation.

524 D) During colony growth in the presence of 1.5  $\mu\text{g}/\text{mL}$  A22, cellular dimensions  
525 gradually revert back to those of cells grown in colonies in the absence of A22,  
526 suggesting adaptation to A22.

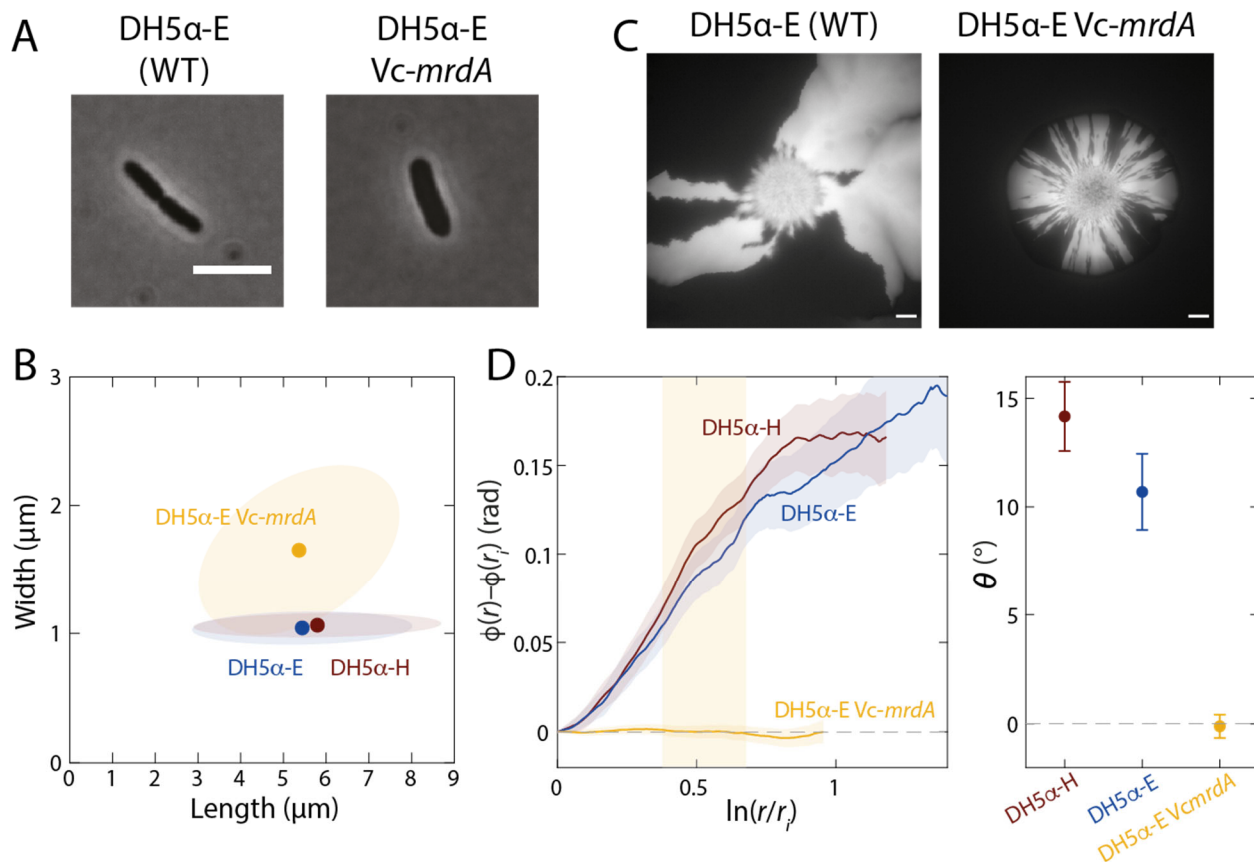

527  
 528 **Figure 3: A genetic perturbation that causes cells to become wider eliminates colony**  
 529 **chirality.**

530 A,B) Heterologous expression of the *mrdA* gene from *Vibrio cholerae* (*Vc-mrdA*) in the *E.*  
 531 *coli* DH5α-E  $\Delta$ *mrdA* background increases cell width during log phase in liquid growth  
 532 relative to wild-type DH5α-H or DH5α-E cells. In (B), circles represent mean values  
 533 and ellipses represent the covariance of width and length.  $n > 50$  cells were quantified  
 534 for each strain. Scale bar: 5  $\mu\text{m}$ .

535 C,D) Colony chirality is reduced by heterologous expression of *Vc-mrdA*. (C) Image of  
 536 typical colonies after 7 days of growth. Scale bars: 1 mm. (D) Left: mean rotation of  
 537 sector boundaries for each strain. Right: the chiral angle is essentially zero for the *Vc-*

538            *mrdA* strain. Each data point is the average of  $n \geq 5$  colonies. Error bars represent 1  
539            standard deviation.

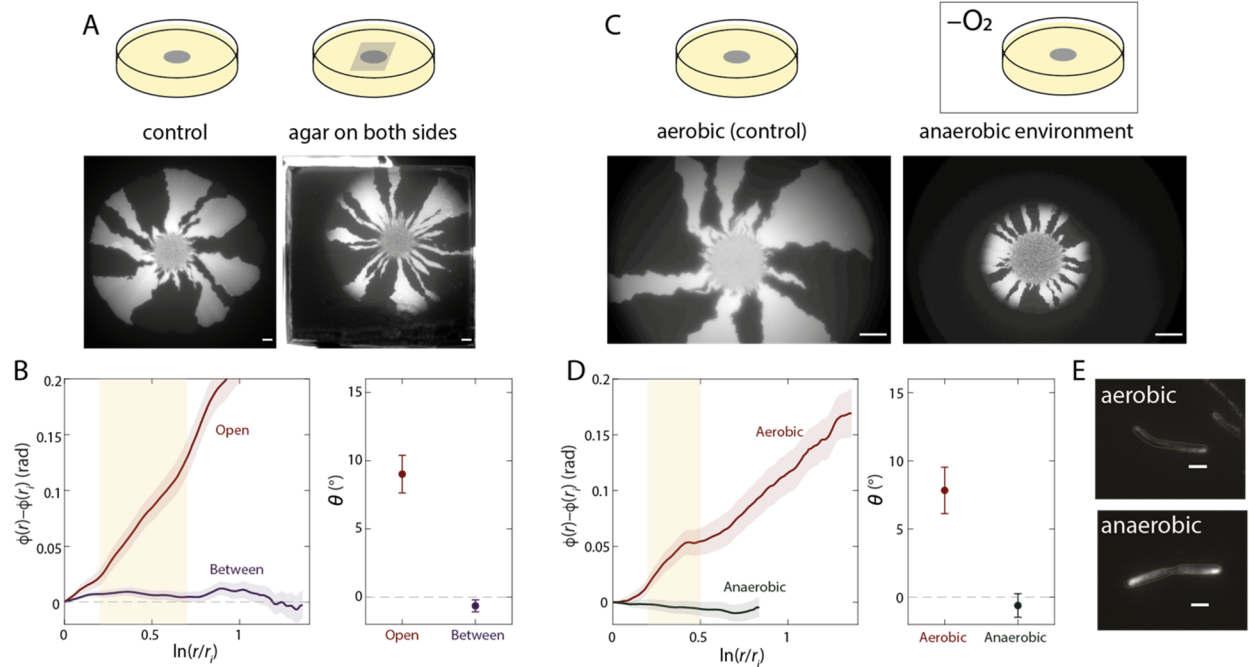

540

541 **Figure 4: Colony chirality is decreased during growth when sandwiched between**

542 **agar surfaces or in anaerobic conditions.**

543 A) Top: schematic of control experiments with an air-agar interface (“Open”, left) and  
 544 sandwiched between two agar surfaces (“Between”, right) (Methods). Bottom:  
 545 representative colonies for each condition. Sector boundaries were straighter in the  
 546 sandwiched colony. Scale bars: 1 mm.

547 B) Left: mean rotation of sector boundaries in each condition in (A). Right: the chiral  
 548 angle is essentially zero for sandwiched colonies. Each data point is the average of  
 549  $n \geq 5$  colonies. Error bars represent 1 standard deviation.

550 C) Top: schematic of growth in aerobic conditions and in an anaerobic chamber. Bottom:  
 551 representative colonies for each condition. Sector boundaries were straighter during  
 552 anaerobic growth. Scale bars: 1 mm.

553 D) Left: mean rotation of sector boundaries in each condition in (C). Right: the chiral  
554 angle is essentially zero during anaerobic growth. Each data point is the average of  
555  $n \geq 5$  colonies. Error bars represent 1 standard deviation.

556 E) DH5 $\alpha$  cells still exhibit twisting at the single-cell level during anaerobic growth at 37  
557 °C, as revealed by Twist-n-TIRF. For both aerobic and anaerobic growth, all cells  
558 whose handedness could be reliably classified were left-handed ( $n=43$ , aerobic;  $n=31$ ,  
559 anaerobic). Scale bars: 2  $\mu\text{m}$ .



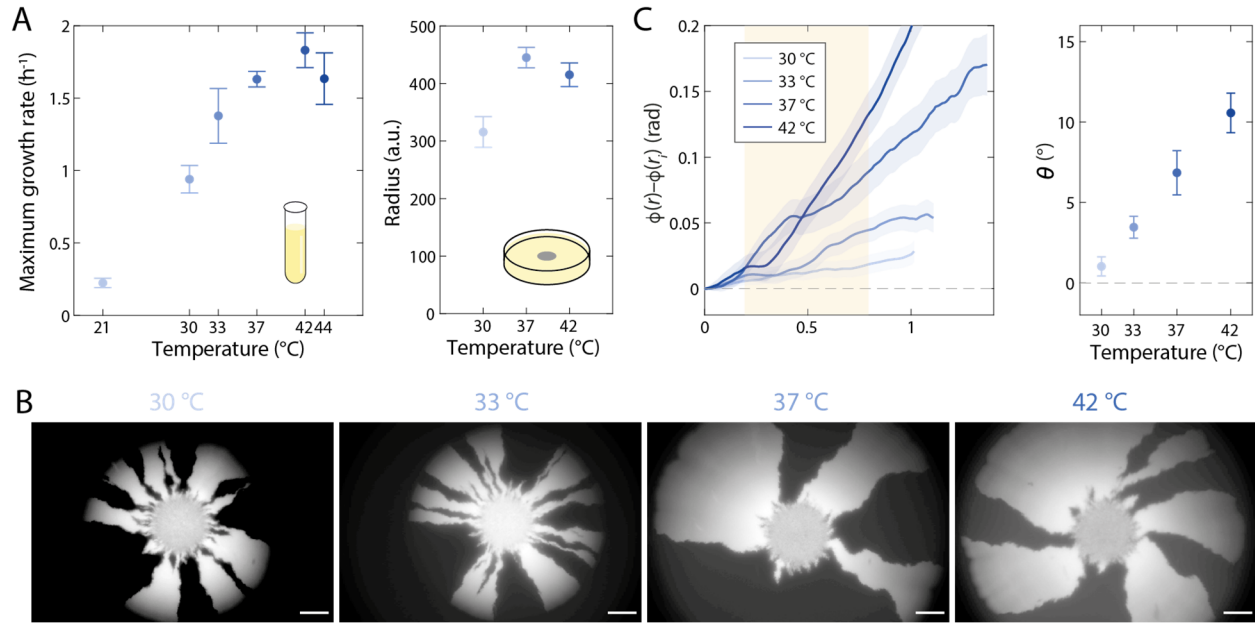

560

561 **Figure 5: Chiral angle increases with increasing temperature.**

562 A) *E. coli* DH5 $\alpha$  Growth depends on temperature. Left: maximum growth rate in liquid  
563 peaks at 42 °C. Right: Colony radius is higher at 37 °C than at 30 or 42 °C.

564 B) Images of representative colonies show increasing chirality at higher temperatures.  
565 Scale bars: 1 mm.

566 C) Left: mean rotation of sector boundaries at each temperature. Right: the chiral angle  
567 continues to increase with increasing temperature, even at 42 °C. Each data point is  
568 the average of  $n \geq 5$  colonies. Error bars represent 1 standard deviation.

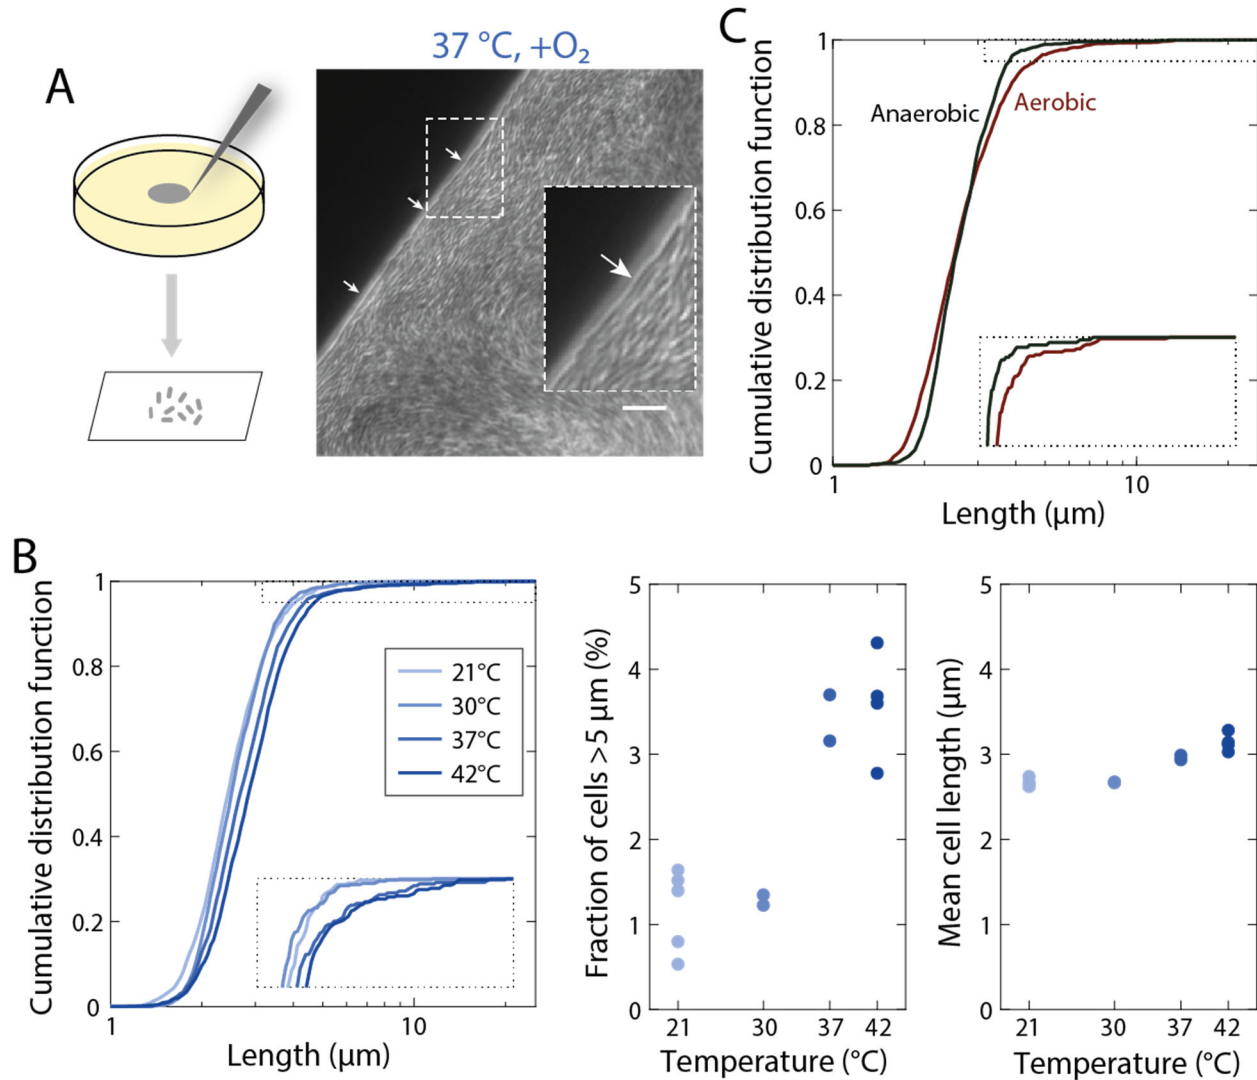

569

570 **Figure 6: Conditions with enhanced colony chirality exhibit increased fractions of**  
571 **filamentous cells at the colony edge.**

572 A) Left: schematic of sampling from the colony edge. Right: imaging of the colony edge  
573 reveals filamentous cells at the border (arrows). Inset is a 200% zoom-in of the region  
574 surrounded by the dashed white line highlighting a filamentous cell.

575 B) At higher temperatures, a larger fraction of the population exhibits filamentation.  
576 Left: the cumulative distribution function of cell length shifts to the right at increasing  
577 temperature. The inset is a zoom-in of the dotted region. Middle: the fraction of cells

578 with length  $>5 \mu\text{m}$  in samples from the edge of colonies increases at increasing  
579 temperature. Right: mean cell length also increases slightly with increasing  
580 temperature. Each circle was computed from  $\geq 16$  fields of view from a sample from a  
581 distinct colony.

582 C) During aerobic growth, a larger fraction of the population exhibits filamentation  
583 compared with anaerobic growth. The inset is a zoom-in of the dotted region.

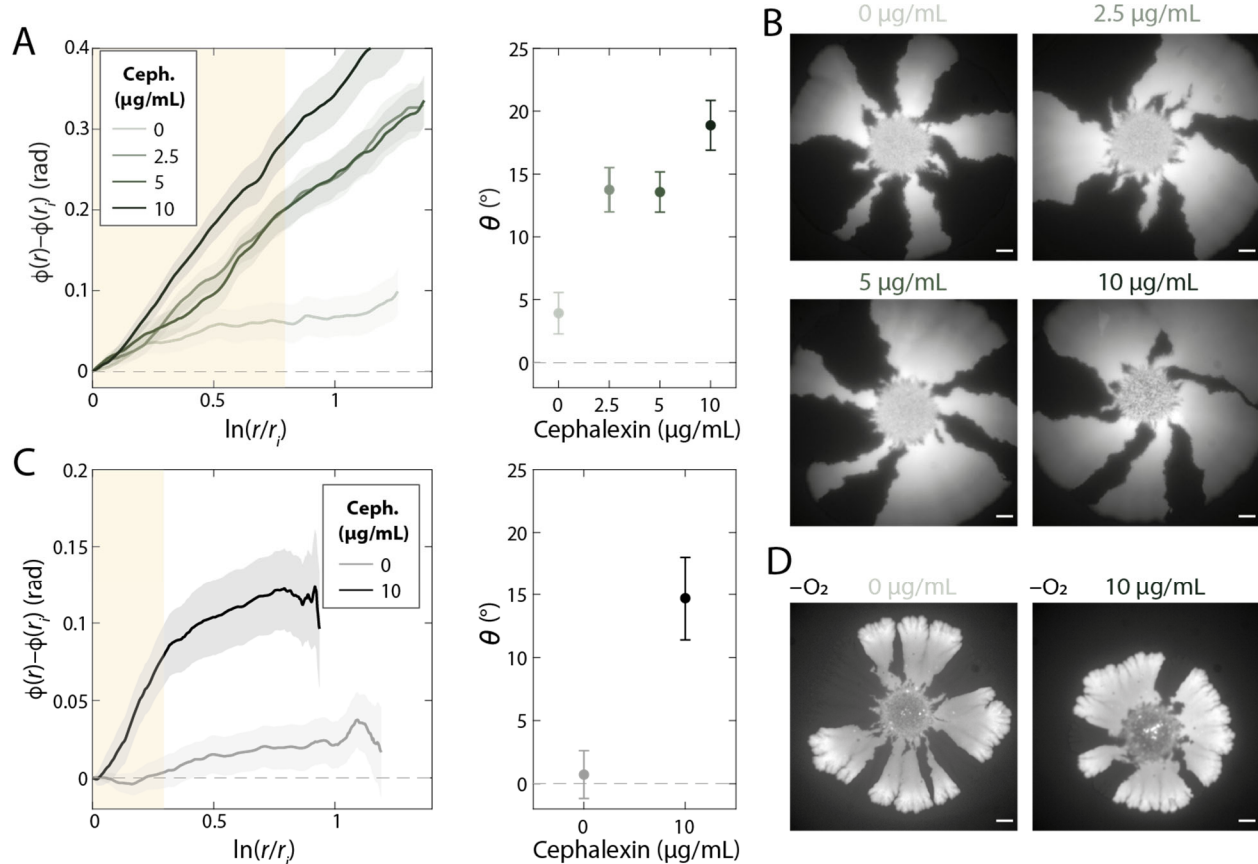

584

585 **Figure 7: Division inhibition using cephalaxin results in enhanced chirality during**  
 586 **aerobic growth and the introduction of chirality during anaerobic growth.**

587 A) Left: mean rotation of sector boundaries of aerobically grown DH5 $\alpha$  wild-type  
 588 colonies with various concentrations of cephalaxin. Right: the chiral angle increases  
 589 with increasing cephalaxin concentration. Each data point is the average of  $n \geq 5$   
 590 colonies. Error bars represent 1 standard deviation.

591 B) Representative colonies grown aerobically with various concentrations of  
 592 cephalaxin. Scale bars: 1 mm.

593 C) Left: mean rotation of sector boundaries of anaerobically grown DH5 $\alpha$  wild-type  
 594 colonies without and with cephalaxin. Right: in the presence, but not in the absence,

595 of cephalixin colonies exhibit chirality. Each data point is the average of  $n \geq 5$

596 colonies. Error bars represent 1 standard deviation.

597 D) Representative colonies grown anaerobically without and with 10  $\mu\text{g}/\text{mL}$

598 cephalixin. Scale bars: 1 mm.

599 **References**

600

- 601 1. P. Satir, Chirality of the cytoskeleton in the origins of cellular asymmetry. *Philos*  
602 *Trans R Soc Lond B Biol Sci* **371** (2016).
- 603 2. H. Shi, D. A. Quint, G. M. Grason, A. Gopinathan, K. C. Huang, Chiral twisting in a  
604 bacterial cytoskeletal polymer affects filament size and orientation. *Nat Commun* **11**,  
605 1408 (2020).
- 606 3. S. Hozumi *et al.*, An unconventional myosin in *Drosophila* reverses the default  
607 handedness in visceral organs. *Nature* **440**, 798-802 (2006).
- 608 4. M. Inaki, J. Liu, K. Matsuno, Cell chirality: its origin and roles in left-right asymmetric  
609 development. *Philos Trans R Soc Lond B Biol Sci* **371** (2016).
- 610 5. S. R. Naganathan, S. Furthauer, M. Nishikawa, F. Julicher, S. W. Grill, Active torque  
611 generation by the actomyosin cell cortex drives left-right symmetry breaking. *Elife*  
612 **3**, e04165 (2014).
- 613 6. T. Shoji *et al.*, Plant-specific microtubule-associated protein SPIRAL2 is required for  
614 anisotropic growth in *Arabidopsis*. *Plant Physiol* **136**, 3933-3944 (2004).
- 615 7. T. S. Ursell *et al.*, Rod-like bacterial shape is maintained by feedback between cell  
616 curvature and cytoskeletal localization. *Proceedings of the National Academy of*  
617 *Sciences of the United States of America* **111**, E1025-1034 (2014).
- 618 8. S. Wang, L. Furchtgott, K. C. Huang, J. W. Shaevitz, Helical insertion of peptidoglycan  
619 produces chiral ordering of the bacterial cell wall. *Proceedings of the National*  
620 *Academy of Sciences of the United States of America* **109**, E595-604 (2012).

- 621 9. N. H. Mendelson, Helical growth of *Bacillus subtilis*: a new model of cell growth.  
622 *Proceedings of the National Academy of Sciences of the United States of America* **73**,  
623 1740-1744 (1976).
- 624 10. J. V. Holtje, Growth of the stress-bearing and shape-maintaining murein sacculus of  
625 *Escherichia coli*. *Microbiol Mol Biol Rev* **62**, 181-203 (1998).
- 626 11. K. D. Young, The selective value of bacterial shape. *Microbiol Mol Biol Rev* **70**, 660-  
627 703 (2006).
- 628 12. L. Furchtgott, N. S. Wingreen, K. C. Huang, Mechanisms for maintaining cell shape in  
629 rod-shaped Gram-negative bacteria. *Mol Microbiol* **81**, 340-353 (2011).
- 630 13. Z. Gitai, N. Dye, L. Shapiro, An actin-like gene can determine cell polarity in bacteria.  
631 *Proceedings of the National Academy of Sciences of the United States of America* **101**,  
632 8643-8648 (2004).
- 633 14. Z. Gitai, N. A. Dye, A. Reisenauer, M. Wachi, L. Shapiro, MreB actin-mediated  
634 segregation of a specific region of a bacterial chromosome. *Cell* **120**, 329-341  
635 (2005).
- 636 15. C. Tropini *et al.*, Principles of bacterial cell-size determination revealed by cell-wall  
637 synthesis perturbations. *Cell Rep* **9**, 1520-1527 (2014).
- 638 16. S. van Teeffelen *et al.*, The bacterial actin MreB rotates, and rotation depends on cell-  
639 wall assembly. *Proceedings of the National Academy of Sciences of the United States of*  
640 *America* **108**, 15822-15827 (2011).
- 641 17. O. Hallatschek, P. Hersen, S. Ramanathan, D. R. Nelson, Genetic drift at expanding  
642 frontiers promotes gene segregation. *Proceedings of the National Academy of*  
643 *Sciences of the United States of America* **104**, 19926-19930 (2007).

- 644 18. O. Hallatschek, D. R. Nelson, Gene surfing in expanding populations. *Theor Popul Biol*  
645 **73**, 158-170 (2008).
- 646 19. K. S. Korolev, J. B. Xavier, D. R. Nelson, K. R. Foster, A quantitative test of population  
647 genetics using spatiogenetic patterns in bacterial colonies. *Am Nat* **178**, 538-552  
648 (2011).
- 649 20. L. Jauffred, R. Munk Vejborg, K. S. Korolev, S. Brown, L. B. Oddershede, Chirality in  
650 microbial biofilms is mediated by close interactions between the cell surface and the  
651 substratum. *ISME J* **11**, 1688-1701 (2017).
- 652 21. M. Silvis *et al.*, Morphological and transcriptional responses to essential-gene  
653 depletion in *Escherichia coli*. (2021).
- 654 22. B. G. Spratt, Distinct penicillin binding proteins involved in the division, elongation,  
655 and shape of *Escherichia coli* K12. *Proceedings of the National Academy of Sciences*  
656 **72**, 2999-3003 (1975).
- 657 23. S. J. Remington, Fluorescent proteins: maturation, photochemistry and  
658 photophysics. *Curr Opin Struct Biol* **16**, 714-721 (2006).
- 659 24. R. Y. Tsien, The green fluorescent protein. *Annu Rev Biochem* **67**, 509-544 (1998).
- 660 25. M. A. Barber, The Rate of Multiplication of *Bacillus Coli* at Different Temperatures.  
661 *The Journal of Infectious Diseases* **5**, 379-400 (1908).
- 662 26. M. Schaechter, O. Maaløe, N. Kjeldgaard, Dependency on medium and temperature of  
663 cell size and chemical composition during balanced grown of *Salmonella*  
664 typhimurium. *J. Gen. Microbiol.* **19**, 592-606 (1958).



- 665 27. P. J. Hedge, B. G. Spratt, Amino acid substitutions that reduce the affinity of  
666 penicillin-binding protein 3 of *Escherichia coli* for cephalexin. *Eur J Biochem* **151**,  
667 111-121 (1985).
- 668 28. M. R. Warren *et al.*, Spatiotemporal establishment of dense bacterial colonies  
669 growing on hard agar. *Elife* **8** (2019).
- 670 29. W. P. Smith *et al.*, Cell morphology drives spatial patterning in microbial  
671 communities. *Proceedings of the National Academy of Sciences of the United States of*  
672 *America* **114**, E280-E286 (2017).
- 673 30. J. van Gestel, F. J. Weissing, O. P. Kuipers, A. T. Kovacs, Density of founder cells affects  
674 spatial pattern formation and cooperation in *Bacillus subtilis* biofilms. *ISME J* **8**,  
675 2069-2079 (2014).
- 676 31. E. Ben-Jacob, I. Cohen, H. Levine, Cooperative self-organization of microorganisms.  
677 *Advances in Physics* **49**, 395-554 (2000).
- 678 32. J. C. Tsai, F. Ye, J. Rodriguez, J. P. Gollub, T. C. Lubensky, A Chiral Granular Gas. *Phys.*  
679 *Rev. Lett.* **94**, 214301 (2005).
- 680 33. S. Fürthauer, M. Stempel, S. W. Grill, F. Jülicher, Active chiral fluids. *Eur. Phys. J. E*  
681 **35**, 89 (2012).
- 682 34. K. Drescher *et al.*, Dancing *Volvox* : Hydrodynamic Bound States of  
683 Swimming Algae. *Phys. Rev. Lett.* **102**, 168101 (2009).
- 684 35. A. P. Petroff, X.-L. Wu, A. Libchaber, Fast-Moving Bacteria Self-Organize into Active  
685 Two-Dimensional Crystals of Rotating Cells. *Phys. Rev. Lett.* **114**, 158102 (2015).
- 686 36. J. Yan, S. C. Bae, S. Granick, Rotating crystals of magnetic Janus colloids. *Soft Matter*  
687 **11**, 147-153 (2015).

- 688 37. A. Snezhko, Complex collective dynamics of active torque-driven colloids at  
689 interfaces. *Current Opinion in Colloid & Interface Science* **21**, 65-75 (2016).
- 690 38. B. C. van Zuiden, J. Paulose, W. T. M. Irvine, D. Bartolo, V. Vitelli, Spatiotemporal  
691 order and emergent edge currents in active spinner materials. *Proceedings of the*  
692 *National Academy of Sciences* **113**, 12919-12924 (2016).
- 693 39. N. H. P. Nguyen, D. Klotsa, M. Engel, S. C. Glotzer, Emergent Collective Phenomena in  
694 a Mixture of Hard Shapes through Active Rotation. *Phys. Rev. Lett.* **112**, 075701  
695 (2014).
- 696 40. K. Yeo, E. Lushi, P. M. Vlahovska, Collective Dynamics in a Binary Mixture of  
697 Hydrodynamically Coupled Microrotors. *Phys. Rev. Lett.* **114**, 188301 (2015).
- 698 41. C. del Junco, L. Tociu, S. Vaikuntanathan, Energy dissipation and fluctuations in a  
699 driven liquid. *Proceedings of the National Academy of Sciences* **115**, 3569-3574  
700 (2018).
- 701 42. C. Scholz, M. Engel, T. Pöschel, Rotating robots move collectively and self-organize.  
702 *Nature Communications* **9**, 931 (2018).
- 703 43. A. Souslov, K. Dasbiswas, M. Fruchart, S. Vaikuntanathan, V. Vitelli, Topological  
704 Waves in Fluids with Odd Viscosity. *Phys. Rev. Lett.* **122**, 128001 (2019).
- 705 44. G. Baardink, G. Cassella, L. Neville, P. A. Milewski, A. Souslov, Complete absorption of  
706 topologically protected waves. *arXiv:2010.07342 [cond-mat, physics:physics]* (2020).
- 707 45. D. Banerjee, A. Souslov, A. G. Abanov, V. Vitelli, Odd viscosity in chiral active fluids.  
708 *Nature Communications* **8**, 1573 (2017).
- 709 46. A. Souslov, A. Gromov, V. Vitelli, Anisotropic odd viscosity via a time-modulated  
710 drive. *Phys. Rev. E* **101**, 052606 (2020).

- 711 47. V. Soni *et al.*, The odd free surface flows of a colloidal chiral fluid. *Nat. Phys.* **15**,  
712 1188-1194 (2019).
- 713 48. B. G. A, K. S. Korolev, Chirality provides a direct fitness advantage and facilitates  
714 intermixing in cellular aggregates. *PLoS Comput Biol* **14**, e1006645 (2018).
- 715 49. N. Stuurman, N. Amdodaj, R. Vale,  $\mu$ Manager: open source software for light  
716 microscope imaging. *Microscopy Today* **15**, 42-43 (2007).
- 717 50. T. Ursell *et al.*, Rapid, precise quantification of bacterial cellular dimensions across a  
718 genomic-scale knockout library. *BMC Biol* **15**, 17 (2017).
- 719 51. O. Sliusarenko, J. Heinritz, T. Emonet, C. Jacobs-Wagner, High-throughput, subpixel  
720 precision analysis of bacterial morphogenesis and intracellular spatio-temporal  
721 dynamics. *Molecular microbiology* **80**, 612-627 (2011).
- 722 52. D. A. Van Valen *et al.*, Deep Learning Automates the Quantitative Analysis of  
723 Individual Cells in Live-Cell Imaging Experiments. *PLoS Comput Biol* **12**, e1005177  
724 (2016).
- 725
